# Supplementary material for: Development of nanoelectrospray high resolution isotope dilution mass spectrometry for targeted quantitative analysis of urinary metabolites: application to population profiling and clinical studies
Source: Royal Society of Chemistry journal article supplement (doi:10.1039/c5ay00850f), 2015-01-01

## Supplementary Data

### Development of nanoelectrospray high resolution isotope dilution mass spectrometry for targeted quantitative analysis of urinary metabolites: Application to population profiling and clinical studies

*Elena Chekmeneva*<sup>a,b</sup>, *Gonçalo Correia*<sup>a</sup>, *Júlia Dénes*<sup>a</sup>, *María Gómez Romero*<sup>a</sup>, *Anisha Wijeyesekera*<sup>a</sup>, *Dora R. Perenyi*<sup>a</sup>, *Yvonne Koot*<sup>d</sup>, *Carolien Boomsma*<sup>d</sup>, *Elisabeth. J. Want*<sup>a</sup>, *Peter H. Dixon*<sup>f</sup>, *Nicholas S. Macklon*<sup>d,e</sup>, *Queenie Chan*<sup>b</sup>, *Zoltán Takáts*<sup>a,c</sup>, *Jeremy K. Nicholson*<sup>a,c</sup> and *Elaine Holmes*<sup>a,c\*</sup>

<sup>a</sup> Biomolecular Medicine, Department of Surgery and Cancer, Faculty of Medicine, Imperial College London, South Kensington, London SW7 2AZ, UK

<sup>b</sup> Department of Epidemiology and Biostatistics, School of Public Health, Imperial College London, St Mary's Campus, Norfolk Place, London W2 1PG, UK,

<sup>c</sup> MRC-NIHR National Phenome Centre, London SW7 2AZ, UK

<sup>d</sup> Utrecht University, The Netherlands

<sup>e</sup> University of Southampton, UK

<sup>f</sup> Institute of Reproductive and Developmental Biology, Imperial College London, UK

\* To whom correspondence should be addressed, *e-mail*: [elaine.holmes@imperial.ac.uk](mailto:elaine.holmes@imperial.ac.uk)

**Supplementary Table S1.** Pregnancy outcomes in each of three consecutive cycles. For each outcome three samples have been collected on the days 18, 22, and 26.

| <b>Patient ID</b> | <b>Cycle 1</b> | <b>Cycle 2</b> | <b>Cycle 3</b> |
|-------------------|----------------|----------------|----------------|
| 39C               | NP             | P              |                |
| 22C               | P              |                |                |
| 21C               | NP             | NP             |                |
| 5C                | NP             | P              |                |
| 19C               | P              |                |                |
| 43C               | NP             | P              |                |
| 8C                | NP             | NP             | P              |
| 53C               | P              |                |                |
| 54C               | NP             | NP             | P              |
| 1C                | NP             | NP             | P              |
| 42C               | P              |                |                |
| 13C               | P              |                |                |
| 18C               | P              |                |                |
| 40C               | P              |                |                |
| 32C               |                |                | EPL            |
| 59C               |                | EPL            | EPL            |
| 16C               | EPL            | EPL            |                |
| 61C               | EPL            | EPL            | EPL            |
| 57C               | EPL            | EPL            |                |

**Supplementary Table S2.** Calibration curves  $ax+b=y$  (average of 3 replicates), linear range and LOQ of the metabolites obtained in water.

| Metabolite               | a      | b       | R <sup>2</sup> | Linear range (µg/mL) * | LOQ µg/mL **<br>in a well (µmol/mmol creatinine) | Literature Value ***<br>(µmol/mmol creatinine) |
|--------------------------|--------|---------|----------------|------------------------|--------------------------------------------------|------------------------------------------------|
| <b>Succinic acid</b>     | 0.0612 | 0.0050  | 0.998          | 0 – 0.833              | 0.18 (5.87)                                      | 0.3-33.3                                       |
| <b>D,L-Leucine</b>       | 0.1810 | -0.0091 | 0.997          | 0.083-0.833            | 0.19 (8.57)                                      | 1.2-19.07                                      |
| <b>Glutaric acid</b>     | 0.0769 | 0.0037  | 0.999          | 0.008-0.833            | 0.16 (5.55)                                      | 0.7-3.6                                        |
| <b>Adipic acid</b>       | 1.1802 | 0.0297  | 0.999          | 0-0.167                | 0.08 (3.24)                                      | 1.6-14.3                                       |
| <b>D,L-Phenylalanine</b> | 0.0703 | 0.0073  | 0.999          | 0.083-0.833            | 0.24 (8.97)                                      | 3.5-11.2                                       |
| <b>Palmitic acid</b>     | 0.0897 | 0.0657  | 0.993          | 0.008-0.833            | 0.38 (8.15)                                      | 2.6-24.3                                       |
| <b>Nicotinamide</b>      | 0.0704 | -0.0005 | 0.995          | 0-0.167                | 0.09 (4.62)                                      | <1                                             |
| <b>Acetylcarnitine</b>   | 0.0588 | -0.0007 | 0.997          | 0-0.167                | 0.12 (3.50)                                      | 0.4-5.9                                        |

\* expressed as the concentration of a calibrator in a well

\*\* LOQ is presented as concentration in a well. In parenthesis: estimated concentration in µmol/mmol creatinine recalculated using an average creatinine concentration and taking into account the urine dilution in a well

**Supplementary Table S3.** Assay of accuracy and precision of the QC samples (replicates of calibrations) performed in the pooled urine sample.

| Metabolite        | Accuracy                               |                                                           |                  | Precision                       |                       |                       |
|-------------------|----------------------------------------|-----------------------------------------------------------|------------------|---------------------------------|-----------------------|-----------------------|
|                   | Target Concentration, $\mu\text{g/mL}$ | Measured Concentration (average of n=5), $\mu\text{g/mL}$ | Accuracy % (n=5) | Concentration, $\mu\text{g/mL}$ | Intra-day (n=5) RSD % | Inter-day (n=9) RSD % |
| Succinic acid     | <b>16.67</b>                           | 17.96                                                     | 107.8            | <b>16.67</b>                    | 9.5                   | 12.3                  |
|                   | <b>1.67</b>                            | 2.32                                                      | 133.9            | <b>1.67</b>                     | 6.0                   | 21.3                  |
|                   | <b>0.83</b>                            | 1.02                                                      | 122.4            | <b>0.83</b>                     | 19.6                  | 37.5                  |
| D,L-Leucine       | <b>16.67</b>                           | 15.589                                                    | 93.5             | <b>16.67</b>                    | 7.6                   | 8.3                   |
|                   | <b>1.67</b>                            | 1.9                                                       | 114.0            | <b>1.67</b>                     | 6.7                   | 13.8                  |
|                   | <b>0.83</b>                            | 0.747                                                     | 89.6             | <b>0.83</b>                     | 12.4                  | 11.1                  |
| Glutaric acid     | <b>16.67</b>                           | 17.411                                                    | 104.5            | <b>16.67</b>                    | 5.0                   | 5.4                   |
|                   | <b>1.67</b>                            | 1.867                                                     | 112.0            | <b>1.67</b>                     | 8.3                   | 11.9                  |
|                   | <b>0.83</b>                            | 0.802                                                     | 96.3             | <b>0.83</b>                     | 14.6                  | 27.8                  |
| Adipic acid       | <b>16.67</b>                           | 16.033                                                    | 96.2             | <b>16.67</b>                    | 7.1                   | 8.6                   |
|                   | <b>1.67</b>                            | 1.613                                                     | 96.8             | <b>1.67</b>                     | 6.7                   | 8.4                   |
|                   | <b>0.83</b>                            | 0.681                                                     | 81.7             | <b>0.83</b>                     | 9.2                   | 10.3                  |
|                   | <b>0.17</b>                            | 0.191                                                     | 114.7            | <b>0.17</b>                     | 4.9                   | 8.2                   |
| D,L-Phenylalanine | <b>1.67</b>                            | 1.684                                                     | 101.0            | <b>1.67</b>                     | 5.2                   | 4.8                   |
|                   | <b>0.83</b>                            | 0.773                                                     | 92.8             | <b>0.83</b>                     | 9.0                   | 15.6                  |
|                   | <b>0.17</b>                            | 0.228                                                     | 136.7            | <b>0.17</b>                     | 22.1                  | 22.8                  |

|                 |              |        |       |              |      |      |
|-----------------|--------------|--------|-------|--------------|------|------|
| Palmitic acid   | <b>1.67</b>  | 2.244  | 134.6 | <b>1.67</b>  | 15.6 | 18.6 |
|                 | <b>0.83</b>  | 0.866  | 103.9 | <b>0.83</b>  | 11.9 | 16.6 |
|                 | <b>0.17</b>  | 0.175  | 104.9 | <b>0.17</b>  | 8.6  | 10.9 |
|                 | <b>16.67</b> | 16.178 | 97.1  | <b>16.67</b> | 7.7  | 15.7 |
| Nicotinamide    | <b>1.67</b>  | 1.934  | 116.0 | <b>1.67</b>  | 7.8  | 7.3  |
|                 | <b>0.83</b>  | 0.783  | 94.0  | <b>0.83</b>  | 10.1 | 10.8 |
|                 | <b>0.17</b>  | 0.174  | 104.4 | <b>0.17</b>  | 10.4 | 11.0 |
|                 | <b>0.08</b>  | 0.086  | 103.6 | <b>0.08</b>  | 11.0 | 21.6 |
| Acetylcarnitine | <b>1.67</b>  | 2.265  | 135.9 | <b>1.67</b>  | 4.5  | 13.6 |
|                 | <b>0.83</b>  | 0.866  | 103.9 | <b>0.83</b>  | 8.4  | 7.2  |
|                 | <b>0.17</b>  | 0.167  | 100.4 | <b>0.17</b>  | 10.5 | 13.7 |
|                 | <b>0.08</b>  | 0.071  | 85.5  | <b>0.08</b>  | 0.0  | 23.8 |

**Supplementary Table S4.** Results of metabolite quantification in the urine samples in  $\mu\text{g/mL}$  (from the calibration curve) and normalized by creatinine quantified (by relative quantification) in each samples in  $\mu\text{g}/(\mu\text{g creatinine})$

| Metabolite               | Median value of absolute concentration in non-diluted urine, $\mu\text{g/mL}$ |       |       | Mean value of absolute concentration in non-diluted urine, $\mu\text{g/mL}$ |       |        | Median value of concentration normalized by creatinine in non-diluted urine, $\mu\text{g}/(\mu\text{g creatinine})$ |      |      | Mean value of concentration normalized by creatinine in non-diluted urine, $\mu\text{g}/(\mu\text{g creatinine})$ |      |      |
|--------------------------|-------------------------------------------------------------------------------|-------|-------|-----------------------------------------------------------------------------|-------|--------|---------------------------------------------------------------------------------------------------------------------|------|------|-------------------------------------------------------------------------------------------------------------------|------|------|
|                          | NP                                                                            | P     | EPL   | NP                                                                          | P     | EPL    | NP                                                                                                                  | P    | EPL  | NP                                                                                                                | P    | EPL  |
| <b>Succinic acid</b>     | 45.10                                                                         | 40.05 | 77.21 | 60.06                                                                       | 73.99 | 102.01 | 0.91                                                                                                                | 0.72 | 1.04 | 1.18                                                                                                              | 0.80 | 1.18 |
| <b>D,L-Leucine</b>       | 16.61                                                                         | 13.75 | 26.22 | 17.63                                                                       | 17.01 | 25.85  | 0.29                                                                                                                | 0.24 | 0.29 | 0.29                                                                                                              | 0.27 | 0.32 |
| <b>Glutaric acid</b>     | 35.83                                                                         | 44.44 | 60.17 | 43.82                                                                       | 46.41 | 66.05  | 0.67                                                                                                                | 0.48 | 0.74 | 0.76                                                                                                              | 0.71 | 0.84 |
| <b>Adipic acid</b>       | 9.76                                                                          | 10.37 | 12.16 | 9.86                                                                        | 10.96 | 12.99  | 0.16                                                                                                                | 0.14 | 0.16 | 0.17                                                                                                              | 0.17 | 0.17 |
| <b>D,L-Phenylalanine</b> | 12.62                                                                         | 12.18 | 22.19 | 22.92                                                                       | 30.56 | 30.79  | 0.27                                                                                                                | 0.18 | 0.24 | 0.47                                                                                                              | 0.28 | 0.52 |
| <b>Palmitic acid</b>     | 11.61                                                                         | 10.73 | 12.67 | 14.99                                                                       | 13.01 | 18.22  | 0.18                                                                                                                | 0.24 | 0.17 | 0.23                                                                                                              | 0.31 | 0.25 |
| <b>Nicotinamide</b>      | 8.76                                                                          | 4.00  | 10.36 | 10.36                                                                       | 5.68  | 11.26  | 0.12                                                                                                                | 0.06 | 0.11 | 0.15                                                                                                              | 0.14 | 0.15 |
| <b>Acetylcarnitine</b>   | 2.29                                                                          | 1.53  | 3.40  | 4.42                                                                        | 5.14  | 4.65   | 0.05                                                                                                                | 0.04 | 0.03 | 0.06                                                                                                              | 0.07 | 0.06 |

**Supplementary Figure S1.** General nESI-HRMS method workflow of data acquisition and processing

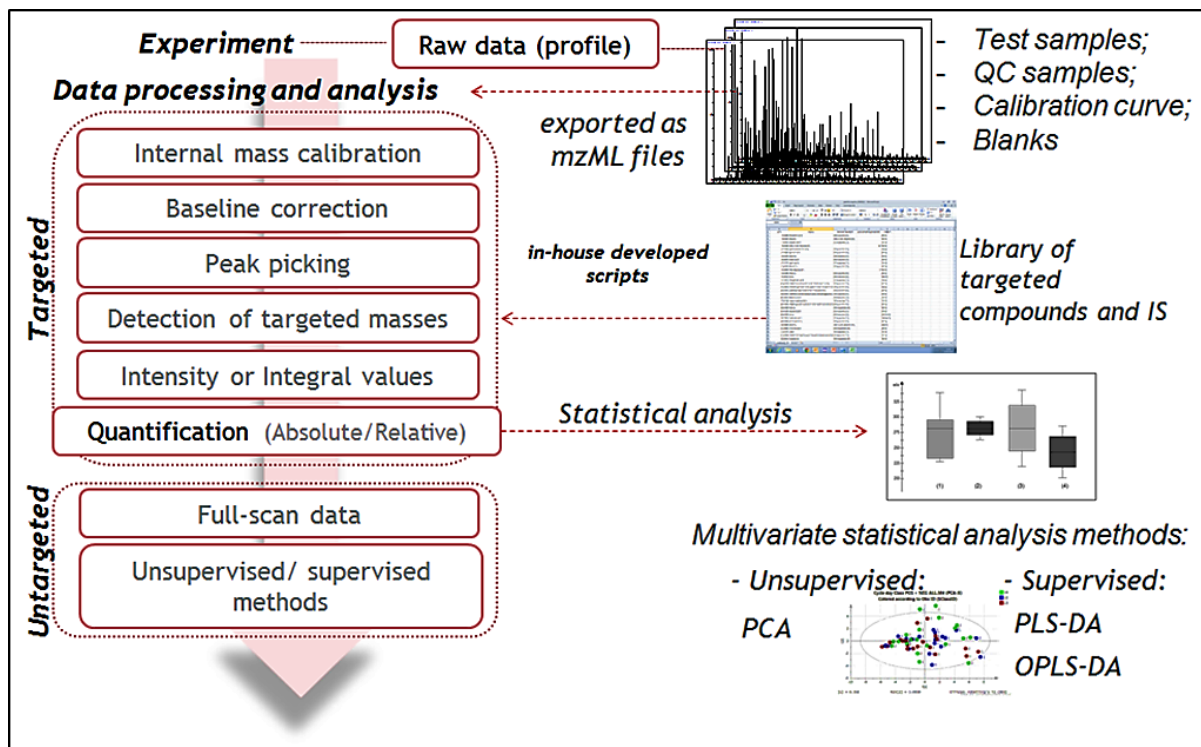

**Supplementary Figure S2.** Full-scan data obtained for three individual samples from each outcome on the same cycle day (22) in positive ion mode in the  $m/z$  range of 100-370; the most prominent identified signals correspond to creatinine (114.068 [M+H]), acetyl-d3-carnitine (207.145 [M+H]), proline betaine (144.105 [M+H]).

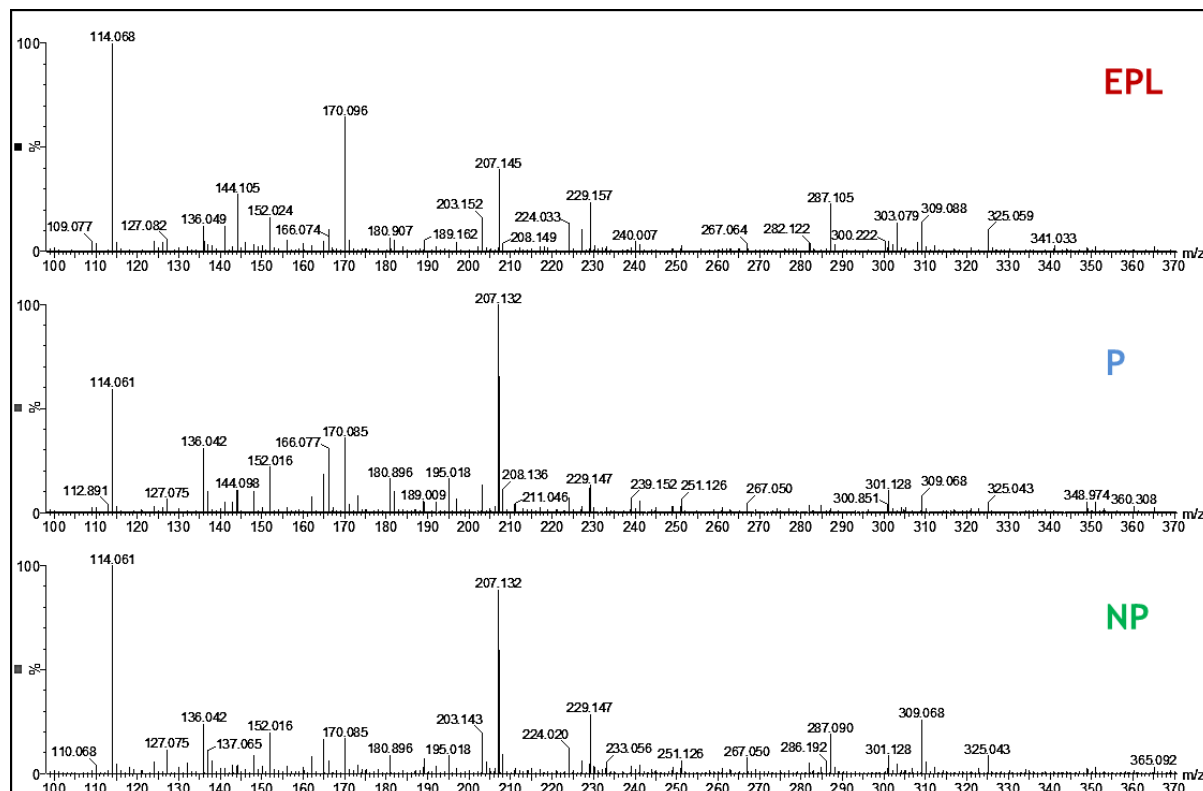



**Supplementary Figure S3.** (a) Effect of dilution of a pooled urine sample in Positive ion mode over the  $m/z$  range of 200-208; signals corresponding to acetyl-L-carnitine and its stable isotope labelled internal standard are highlighted; (b) intensities of endogenous acetyl-L-carnitine and nicotinamide and their stable isotope labelled internal standards as a function of dilution factor.

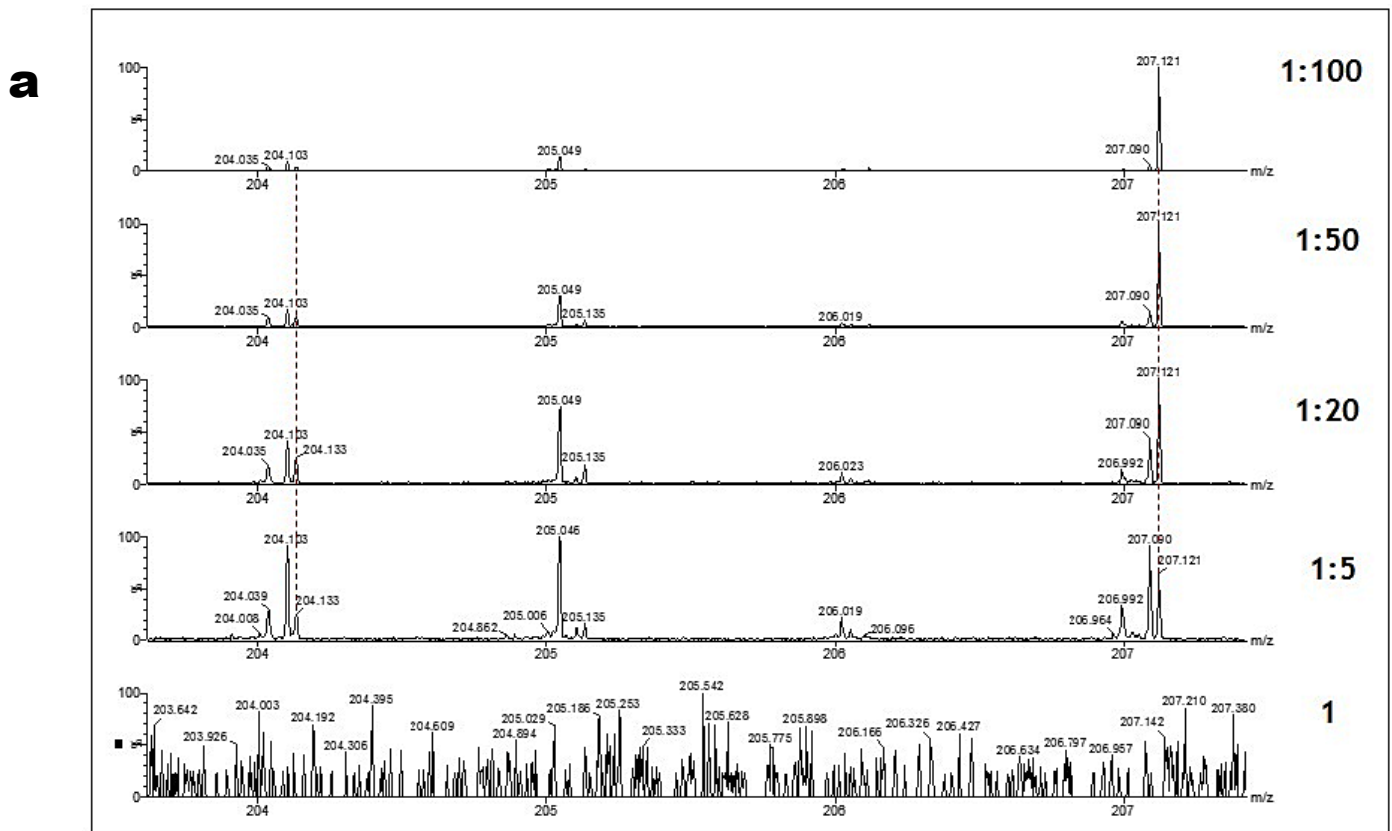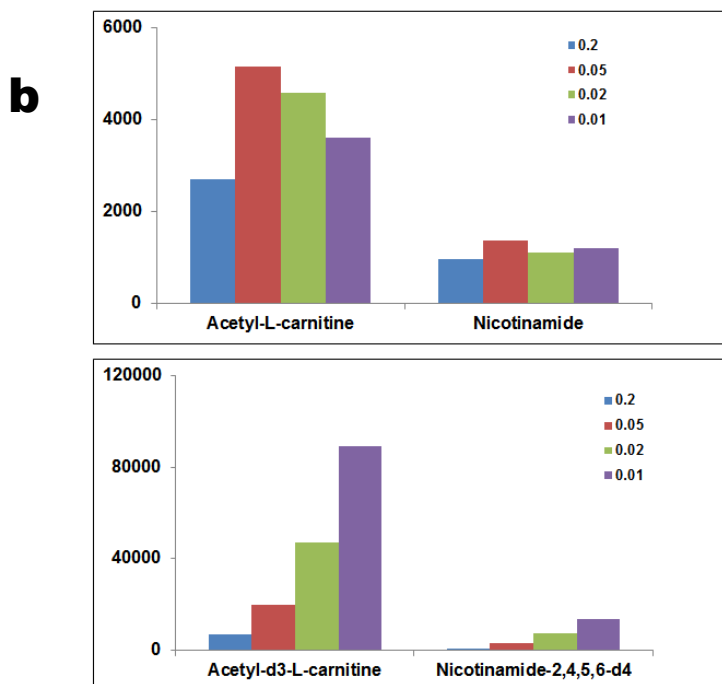

**Supplementary Figure S4.** Examples of CID mass spectra of succinic acid (a), hippuric acid (b), and N-acetylneurmainic acid (c) acquired in negative ion mode, and of acetylcarnitine (d) and creatinine (e) acquired in positive ion mode for the authentic chemical standard, urine spiked with the standard and non-spiked urine pooled sample.

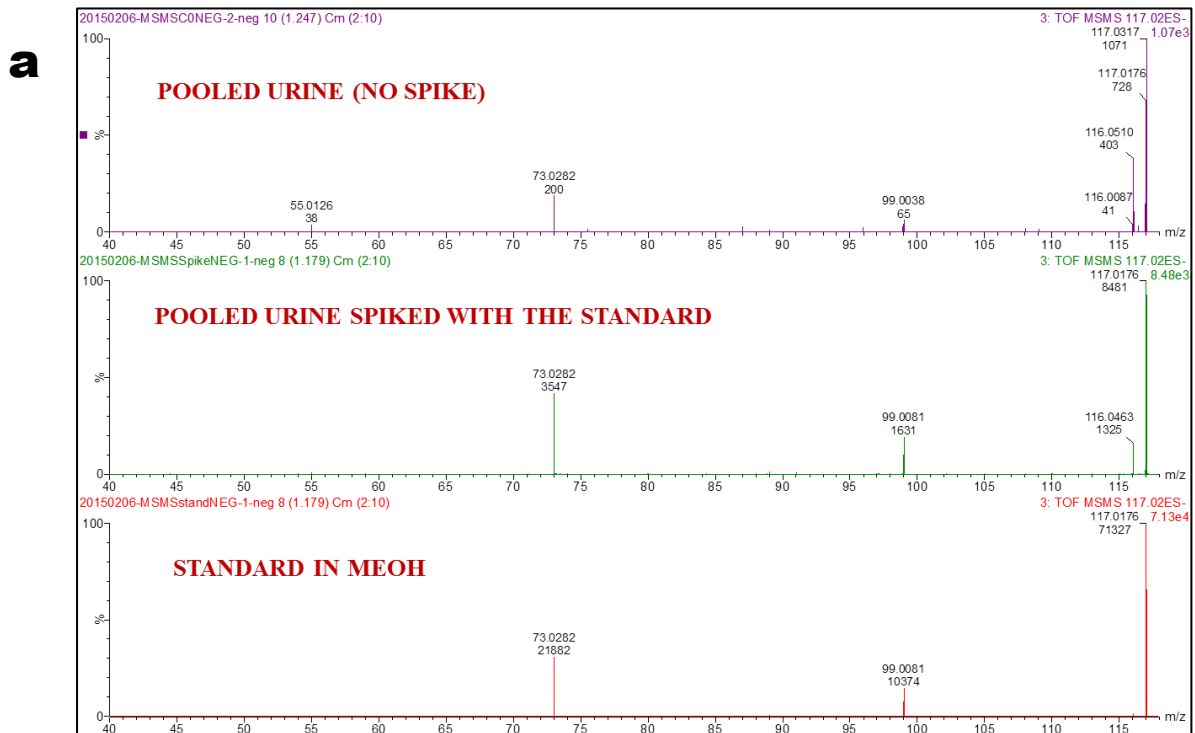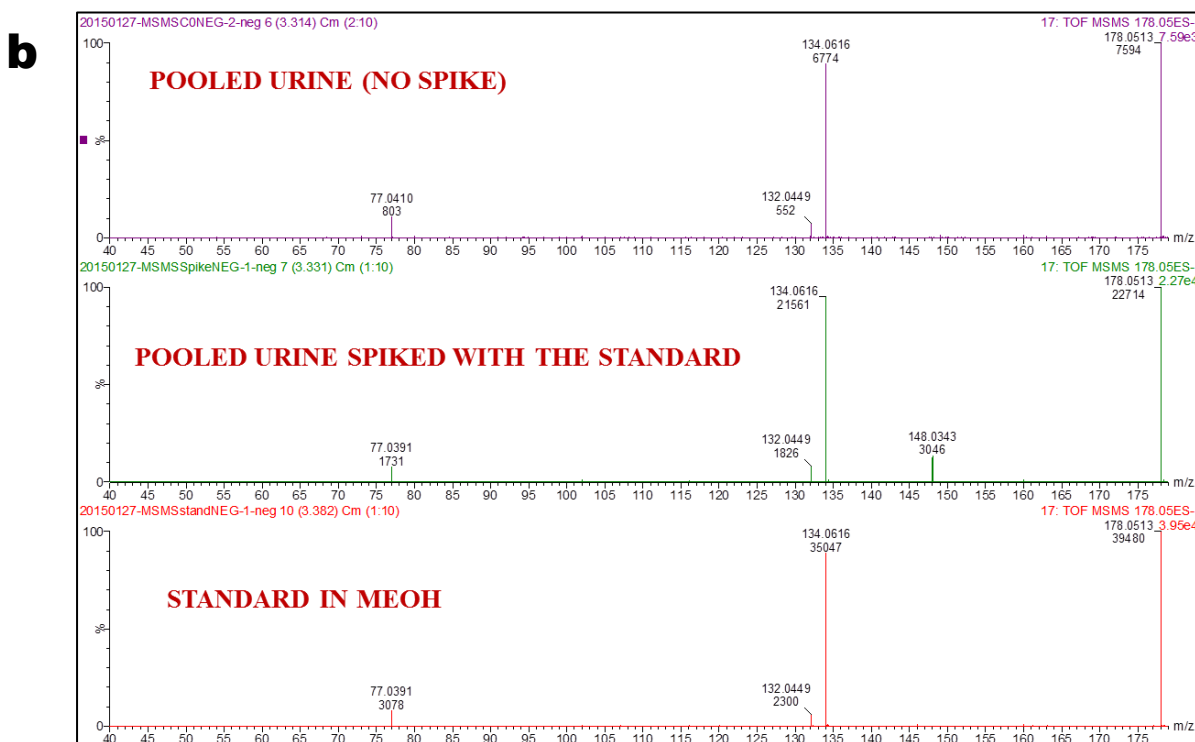

c

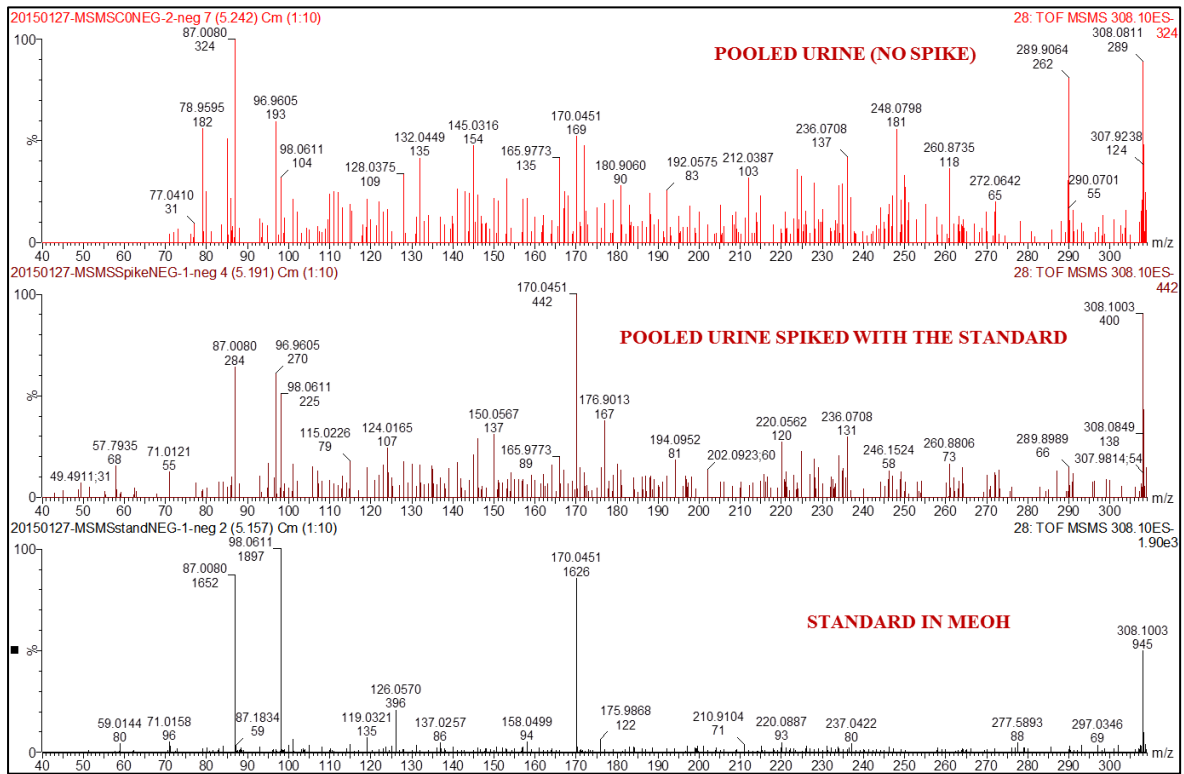

d

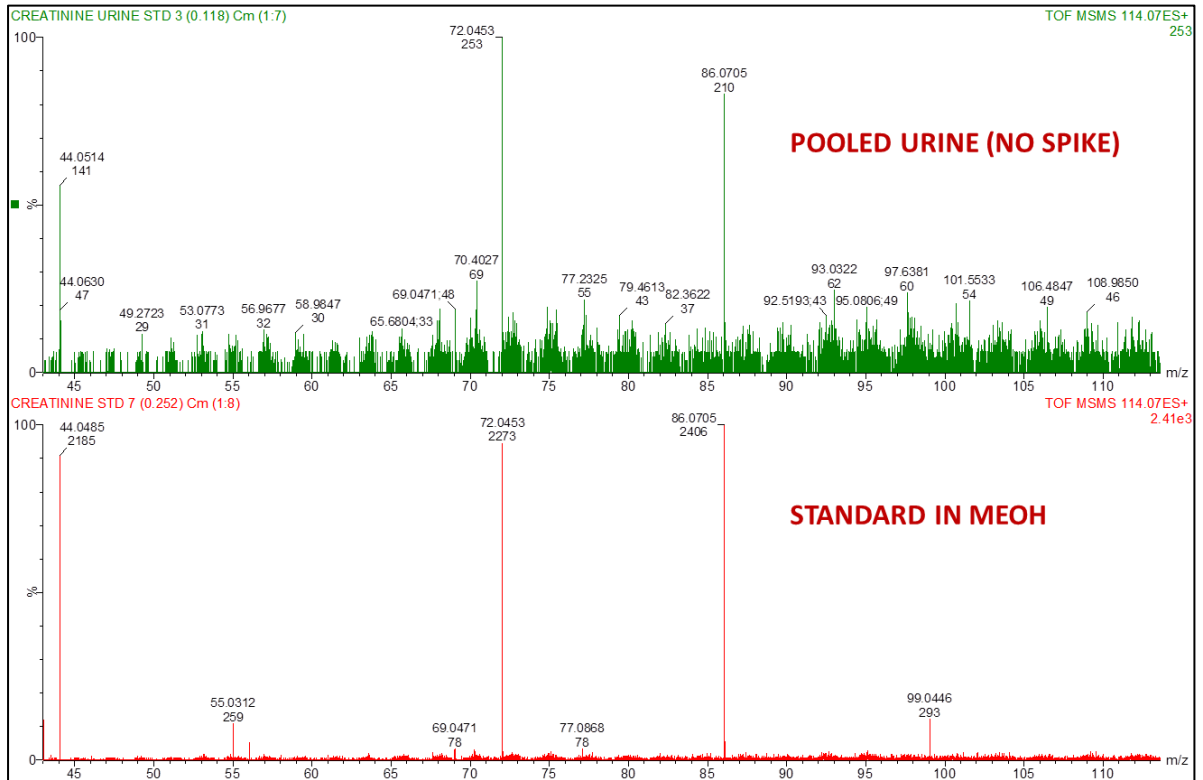

e

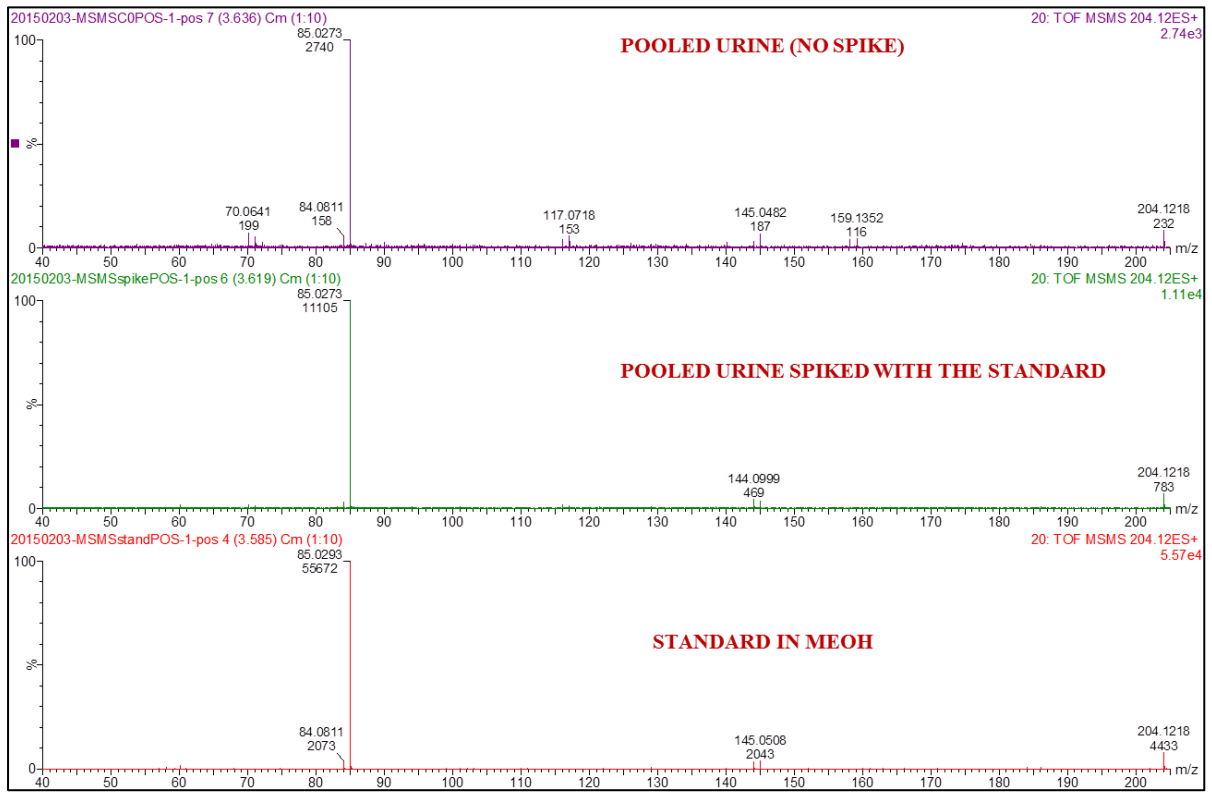

Supplement: c5ay00850f1.pdf [file c5ay00850f1.pdf]
